# Prediction of chronological age from resting-state EEG power in the first three years of life

Winko W. An<sup>1,2,3</sup>, Aprotim C. Bhowmik<sup>1</sup>, Charles A. Nelson<sup>1,3,4</sup>,  
Carol L. Wilkinson<sup>1,3\*</sup>

<sup>1</sup>Developmental Medicine, Boston Children’s Hospital, 300 Longwood Avenue, Boston, 02115, MA, USA.

<sup>2</sup>Rosamund Stone Zander Translational Neuroscience Center, Boston Children’s Hospital, 300 Longwood Avenue, Boston, 02115, MA, USA.

<sup>3</sup>Harvard Medical School, 25 Shattuck St, Boston, 02115, MA, USA.

<sup>4</sup>Harvard Graduate School of Education, 13 Appian Way, Cambridge, 02138, MA, USA.

\*Corresponding author(s). E-mail(s): [carol.wilkinson@childrens.harvard.edu](mailto:carol.wilkinson@childrens.harvard.edu);

Contributing authors: [wenkang.an@childrens.harvard.edu](mailto:wenkang.an@childrens.harvard.edu);

[corybhowmik@gmail.com](mailto:corybhowmik@gmail.com); [charles.nelson@childrens.harvard.edu](mailto:charles.nelson@childrens.harvard.edu);

## Abstract

The infant brain undergoes rapid and significant developmental changes in the first three years of life. Understanding these changes through the prediction of chronological age using neuroimaging data can provide insights into typical and atypical brain development. We utilized longitudinal resting-state EEG data from 457 typically developing infants, comprising 938 recordings, to develop age prediction models. The multilayer perceptron model demonstrated the highest accuracy with an  $R^2$  of 0.82 and a mean absolute error of 92.4 days. Aperiodic offset and periodic theta, alpha, and beta power were identified as key predictors of age via Shapley values. Application of the model to EEG data from infants later diagnosed with autism spectrum disorder or Down syndrome revealed significant underestimations of chronological age. This study establishes the feasibility of using EEG to assess brain maturation in early childhood and supports its potential as a clinical tool for early identification of alterations in brain development.

**Keywords:** brain age, EEG, neurodevelopment, autism, Down syndrome

## 1 Introduction

Over the first three years of life, the infant brain undergoes dramatic changes across multiple scales. These developmental processes include structural increases in both cortical volume [1] and surface area [2], as well as changes occurring at the level of synaptogenesis [3, 4], inhibitory neuron migration and maturation, and network formation [5]. It is presumed that the coordinated timing of these foundational neurodevelopmental processes is generally similar across infants, and that significant alterations in these processes would impact later brain functioning and in turn cognition and behavior.

One way to study brain development across multiple scales is through the prediction of chronological age based on neuroimaging data [6]. The concept of ‘brain age’ largely began in

058 the area of aging research, with the goal of better understanding differences between healthy  
059 brain aging versus advanced brain aging associated with neurodegenerative disorders [7,  
060 8]. However, there is growing interest in similarly understanding the developing brain and  
061 how differences in predicted versus chronological brain age (termed the ‘brain age gap’)  
062 relate to various neurodevelopmental conditions such as autism spectrum disorder, attention  
063 deficit/hyperactivity disorder, and intellectual disability [9–11]. It is hypothesized that, if  
064 a child has altered early brain development, their estimated brain age will be substantially  
065 different from their chronological age (i.e., a more negative brain age gap). Thus far, the  
066 majority of brain age studies have focused on predicting across a broad age range, from  
067 infancy to adulthood, with a very limited number of samples in infants and toddlers [12,  
068 13]. This limited study of early development prevents a fine-grained evaluation of brain  
069 milestones critical for developmental processes and reduces opportunities to develop clinical  
070 tools effective for early screening. In addition, no published studies have utilized EEG to  
071 predict age specifically in infants and toddlers, and only a handful have been published  
072 utilizing structural MRI and diffusion tensor imaging [14–16]. Finally, predictive brain age  
073 studies often do not include investigation of feature importance within machine learning  
074 models, preventing identification and characterization of features relevant to developmental  
075 brain maturation.

076 Using resting state longitudinal EEG data collected from 457 typically developing infants  
077 (938 EEG recordings) we first demonstrate the accuracy of four different linear or nonlinear  
078 machine learning models in predicting chronological age using resting state EEG features.  
079 Then, using an innovative approach that combines Shapley values and hierarchical clustering  
080 we identified clusters of features (aperiodic offset and periodic alpha and beta band power)  
081 contributing most to age prediction models. Finally, to explore whether developmental, EEG-  
082 based, brain age predictive models could be used as a marker of altered brain development  
083 we applied our model to EEG data collected from either infants and toddlers later diagnosed  
084 with autism spectrum disorder (ASD) or infants and toddlers with Down syndrome (DS).  
085 In the ASD group, our model significantly underestimated chronological age at the oldest  
086 age bin (1000 – 1150 days), but not at younger bins; in the DS group, this underestimation  
087 of age was significant across the full range of age prediction.

088

## 089 **2 Results**

090

### 091 **2.1 Prediction of chronological age from EEG power**

092

093 Resting-state EEG data collected in the same laboratory from typically developing infants  
094 and toddlers aged 2 – 38 months were used to create predictive models. A set of 18 features  
095 from each of 4 regions of interest (frontal, temporal, central, posterior) were calculated from  
096 aperiodic and periodic power spectra using an automated pipeline to enhance reproducibility.  
097 Absolute, aperiodic, and periodic power spectra by age bins are shown in Figure 1. Features  
098 included measures characterizing aperiodic and periodic activity and principal components  
099 in pre-defined frequency bands (See Methods for more details).

100 With these 72 features we trained and tested four distinct regression models: Lasso, Ran-  
101 dom Forest, XGBoost, and Multilayer Perceptron (MLP). Detailed model specifications are  
102 provided in Methods, and the architecture of the MLP is shown in Figure 2B. Chronological  
103 age was reliably predicted from EEG in all four models (Figure 2C). The MLP yielded the  
104 best results among all models with an  $R^2$  of 0.82 and a mean absolute error (MAE) of 92.9  
105 days. Notably, this MAE accounts for a mere 8.5% of the age range covered in our dataset,  
106 which spans from 59 days to 1150 days. The other three models had MAE ranging from 113.4  
107 – 131.6 days, with  $R^2$  between 0.69 and 0.76 (Figure 2C). In all four models, the variance  
108 in prediction errors increased with age, suggesting the presence of heteroskedasticity in the  
109 regression analysis (Figure 2D), which was confirmed by a Breusch-Pagan Lagrange Multi-  
110 plier test ( $p < 0.001$  in all models). This observation justified (and originally motivated) the  
111 application of the Yeo-Johnson transformation to chronological age prior to model training  
112 (for details, see Section 5.4). Additionally, the absolute prediction error significantly corre-  
113 lated with age, in which a positive error (i.e., predicted age  $>$  actual age) was associated  
114 with a younger age (Pearson’s  $r > 0.034$ ,  $p < 0.001$  in all models). Similar observations have

been reported in previous brain age prediction studies, and is commonly referred to as “age bias” in prediction error [17–19].

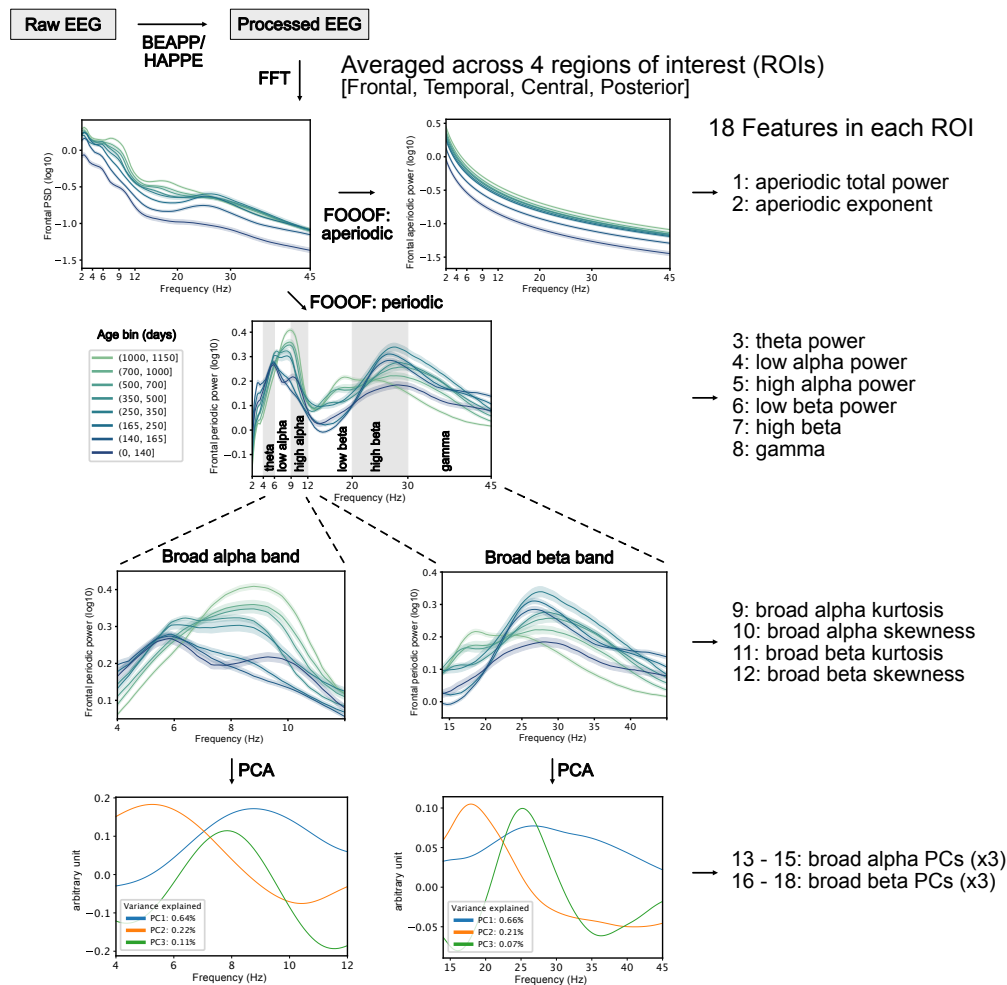

**Fig. 1** Feature extraction steps in this study. Raw EEG signals were cleaned using an automated processing pipeline: BEAPP [20] and HAPPE [21]. Power spectral density (PSD) was calculated from each electrode in processed EEG via Fast Fourier Transform (FFT) and averaged across four regions of interest (ROIs): frontal, temporal, central, and posterior. Then, the PSD was parametrized into aperiodic and periodic components using SpecParam [22]. From the aperiodic component, we extract two features in each ROI: total power and exponent. From the periodic component, first, we extracted six features of power, one for each canonical frequency band: theta (4 – 6 Hz), low alpha (6 – 9 Hz), high alpha (9 – 12 Hz), low beta (12 – 20 Hz), high beta (20 – 30 Hz), and gamma (30 – 45 Hz). Second, we analyzed the periodic component within the broad alpha (4 – 12) and broad beta (14 – 45) bands, as we observed a strong age effect on the shape of PSD in these bands. From each band, we extracted two features of power distribution: kurtosis and skewness. Additionally, we applied a principal component analysis (PCA) and extracted three features (PC1 – 3) in each band — together, they accounted for >90% of total variance in each band. In total, we extracted 72 features from each EEG sample — 18 features in each of the 4 ROIs.

## 2.2 Importance of EEG features in age prediction

Next, we analyzed feature importance to identify EEG features that drive model prediction and thus are tightly associated with early brain development. We employed the Shapley Additive Explanations (SHAP), a game theoretic approach to explain the output of machine learning models [23]. This algorithm assigns a value to *each feature* within every EEG sample (each recording), quantifying how much one feature shifts a model prediction from a baseline output (the average of all training samples). Feature importance can then be

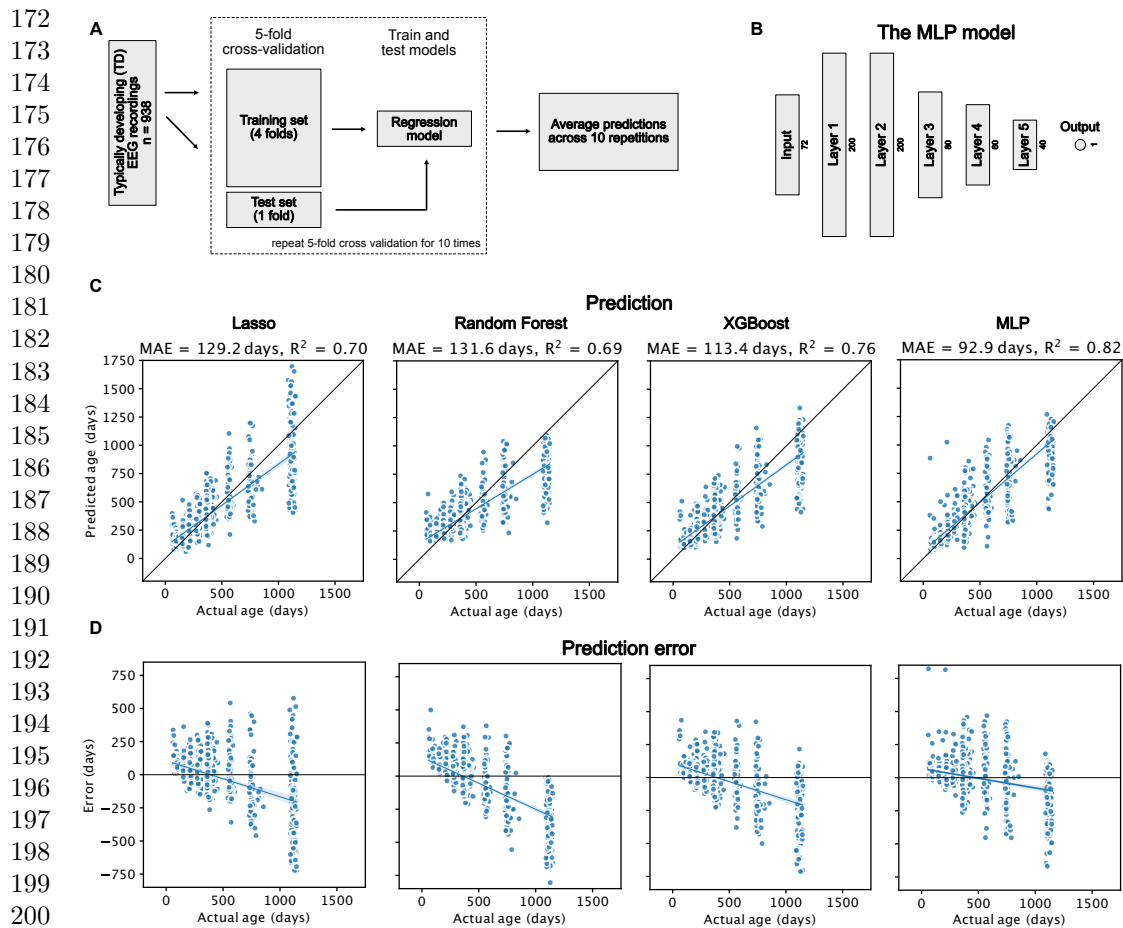

**Fig. 2** A: The schematic diagram of training and test steps. B: The architecture of the multi-layer perceptron (MLP) model in this analysis. C: Prediction results for each of the four regression models. The mean absolute error (MAE) and  $R^2$  of each model are shown in the headings. The diagonal represents perfect prediction (i.e.,  $y = x$ ). D: Prediction error for each of the four models.

inferred from the absolute value of SHAP. Multicollinearity is a common challenge in EEG data that can cause misleading interpretations of feature importance [24]. To solve this problem, we leveraged the additive property of SHAP [25], where the joint importance of two features can be estimated by the sum of their SHAP values; we split the 72 features into 11 clusters (Figure 3C) using hierarchical clustering and summed SHAP values within each feature cluster (Cluster-SHAP). Cluster importance was then evaluated from the mean absolute value of Cluster-SHAP across samples (mean |Cluster-SHAP|) and the correlation between Cluster-SHAP and actual age. In both metrics, a higher value indicates greater cluster importance [26].

Using the above approach, we identified two clusters of features with the highest mean |Cluster-SHAP| — C2, consisting of features in the periodic alpha band (low/high alpha power and PC1 in broad alpha band), and C1, consisting of features in the periodic beta band (low beta power and PC2 in broad beta band) (Figure 3D; Table 1). They were followed by C7 and C8, consisting of features in the theta band and aperiodic offset, respectively. The Cluster-SHAP values in these feature clusters, especially in C1, C2, and C8, also significantly correlated with age (Pearson's  $r \geq 0.23$ ,  $p < 0.001$ ; Figure 3E; Table 1). This further validates the importance of these features as they associated a more positive shift in model output with older chronological age, facilitating more accurate predictions. In summary, we identified features in aperiodic offset and periodic theta, alpha, and low beta band as important drivers of age prediction.

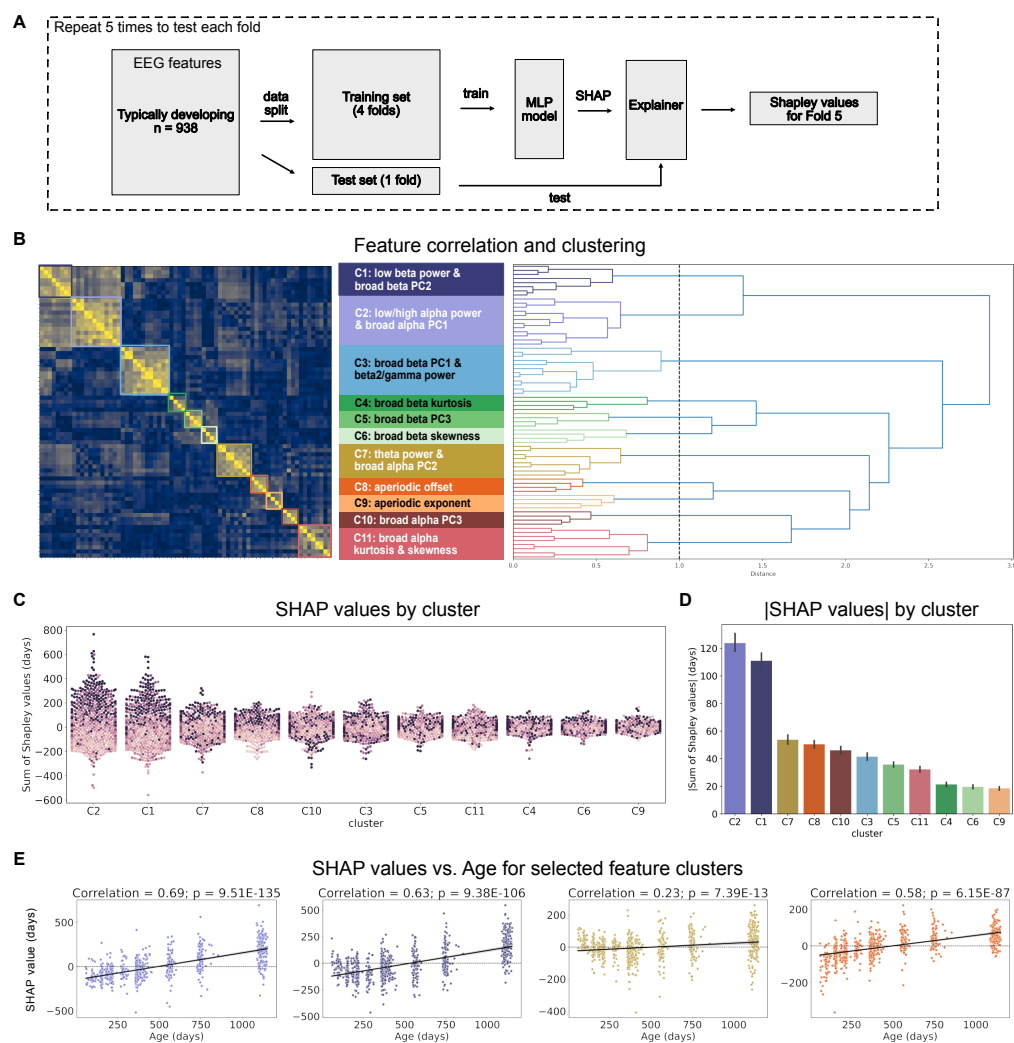

**Fig. 3** A: Schematic diagram for the feature importance analysis. B: Correlation between each pair of EEG features (left) and the hierarchical clustering (right) based on feature correlation. Each cluster contains different types of features and is labelled with a color; the same labelling scheme applies to all figures in this paper. C: SHAP values in each feature cluster. SHAP value was calculated for each feature in each sample (i.e., EEG recording). Every point in this figure represents the SHAP value summed across all features in a cluster in one sample; the darkness of color represents the age of this sample. D: The average absolute SHAP values across all samples in each feature cluster. Error bars indicate standard error. E: Relationship between SHAP values and age in four selected feature clusters. Black line represents the best linear fit. Correlation was calculated using Pearson's  $r$ .

### 2.3 Prediction of age in children with autism or Down syndrome

To assess whether an EEG-based brain-age prediction model in early development could be useful in early identification of children with neurodevelopmental disorders, we applied our model on EEG data from infants later diagnosed with ASD or with Down syndrome (DS) and compared its prediction with that of the TD group. To assess prediction accuracy within the ASD cohort, we first created a test set with data from children with ASD and age-matched TD peers ( $n = 246$  EEGs in each group). We divided the remaining 692 TD samples into 10 folds with equal sizes and trained our best-performing MLP model (Figure 2B) on 9 random folds. We repeated this process 10 times, each time with a different fold left-out for testing, and the outputs from these 10 models were averaged as the final prediction for each test sample. As expected, age of the TD children was accurately predicted by this model (MAE = 100.2 days); the fitted prediction line for the TD group almost overlapped with the line of perfect prediction (Figure 4A). For ASD infants, prediction was comparatively less

| Cluster | Features                                 | Cluster-SHAP <br>mean (std) | Correlation with age |        |
|---------|------------------------------------------|-----------------------------|----------------------|--------|
|         |                                          |                             | r                    | p      |
| C2      | low/high alpha power,<br>broad alpha PC1 | 120.22 (94.07)              | 0.69                 | <0.001 |
| C1      | low beta power,<br>broad beta PC2        | 110.66 (87.06)              | 0.63                 | <0.001 |
| C7      | theta power,<br>broad alpha PC2          | 54.10 (50.40)               | 0.23                 | <0.001 |
| C8      | aperiodic offset                         | 50.29 (42.80)               | 0.58                 | <0.001 |
| C10     | broad alpha PC3                          | 46.69 (46.54)               | 0.02                 | 0.517  |
| C3      | broad beta PC1,<br>high beta/gamma power | 42.43 (42.07)               | 0.07                 | 0.031  |
| C11     | broad alpha kurtosis<br>and skewness     | 36.87 (35.77)               | 0.21                 | <0.001 |
| C5      | broad beta PC3                           | 35.25 (29.99)               | 0.25                 | <0.001 |
| C6      | broad beta skewness                      | 20.28 (20.87)               | 0.12                 | <0.001 |
| C4      | broad beta kurtosis                      | 19.56 (22.07)               | 0.10                 | 0.002  |
| C9      | aperiodic exponent                       | 18.87 (18.64)               | 0.16                 | <0.001 |

**Table 1** The absolute values of Cluster-SHAP and their correlation with age in each feature cluster. Rows are sorted from the highest |Cluster-SHAP| to the lowest.

accurate (MAE = 107.2 days) with age being underestimated, especially at older ages. A series of two-sample t-tests were conducted to compare the prediction errors between groups at pre-defined age bins (Table 3). A significant difference was only observed at the oldest age bin (1000 – 1150 days;  $p = 0.007$ , Cohen’s  $d = 0.87$ ; Figure 4B). We then conducted an exploratory analysis to compare the EEG features between groups within this oldest age bin via two-sample t-tests. In the frontal ROI, for example, significant group differences were observed in broad beta band skewness ( $p = 0.003$ ), broad alpha band skewness ( $p = 0.022$ ), and aperiodic exponent ( $p = 0.017$ ). Four other features (theta power, aperiodic offset, broad alpha band PC3, and broad beta band PC3) showed trending significance in their difference between the two groups ( $0.05 < p < 0.1$ ).

A similar set of analyses were conducted to compare age prediction between TD and DS groups, where DS ( $n = 23$ ) and age-matched TD samples were reserved for testing, and the remaining TD samples were used to train the MLP model. Prediction for the TD group (MAE = 107.0 days) was more accurate than that for the DS group (MAE = 331.9 days), in which the model substantially underestimated the age of children with DS (Figure 4C & 4D); brain age gap was significantly more negative in the DS than in the TD group ( $p < 0.001$ , Cohen’s  $d = 1.32$ ). Different from the comparisons between TD and ASD, more features with high importance showed significant difference between TD and DS (Figure 4F).

### 3 Discussion

Here we demonstrate that resting-state EEG features, extracted from aperiodic and periodic power spectra, can reasonably predict chronological age early in child development via a multi-layer perceptron (MLP) model. With an innovative approach combining Shapley values and hierarchical clustering, we identified two important clusters of features, namely the periodic alpha and beta band power, that contributed most to age prediction. In addition, as a proof of concept, we tested this MLP model’s ability to capture early signs of neurodevelopmental conditions by applying this model to EEG collected from children who later received an ASD diagnosis or children with DS. The model significantly underestimated

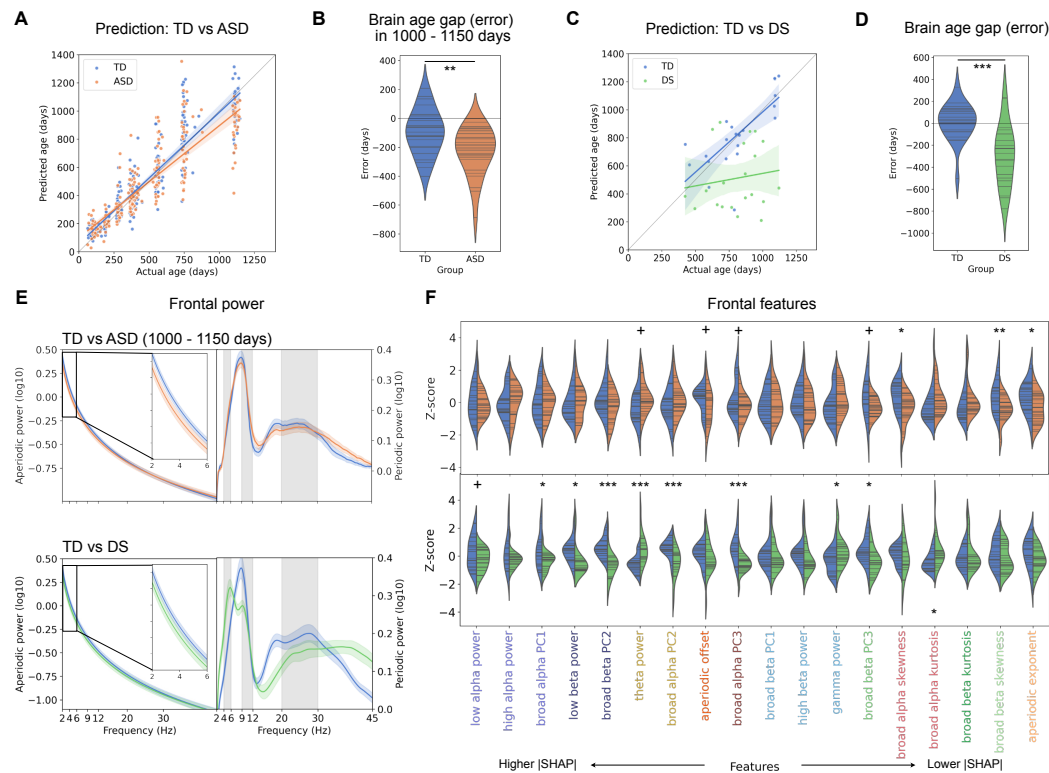

**Fig. 4** Comparing brain age prediction between children with typical development (TD) and neurodevelopmental disorders. A: Age prediction in TD and ASD using a MLP model depicted in Figure 2B. B: Brain age gap comparison between ASD and TD in 1000 – 1150 days. C: Age prediction in TD and DS using the same MLP model. D: Brain age gap comparison between DS and TD. E: Aperiodic and periodic power in the frontal ROI in TD vs ASD in 1000 – 1150 days (upper) and TD vs DS (lower). F: Exploratory feature comparisons, TD vs ASD in 1000 – 1150 days (upper) and TD vs DS (lower), in the frontal ROI as an example. Each feature was denoted as a Z score after being normalized by the mean and standard deviation across two groups.

+ ,  $p < 0.1$ ; \* ,  $p < 0.05$ ; \*\* ,  $p < 0.01$ ; \*\*\* ,  $p < 0.001$

chronological age in toddlers with ASD and in infants and toddlers with DS, supporting the brain age gap as a potential tool for early identification of delays or alteration in early brain development.

Our work is one of the first studies investigating EEG-based age prediction across the first three years of life; only a handful of published neuroimaging-based age-prediction studies overlap with our age range (Table 2), and our MLP model yielded comparable results. Built upon one of the most extensive neuroimaging samples of infants and toddlers to date, our study exclusively focuses on early brain development. A model dedicated to the infant-toddler period facilitates the detection of the rapid developmental changes occurring both structurally and functionally during this period [27]. In doing so, it also improves the model's potential in identifying early indicators of alterations in brain development. While surprisingly few studies have used EEG in brain-age prediction, EEG may be an ideal candidate for models focused on infant and toddler years. Unlike MRI, EEG is low-cost and can be collected in awake and moving children, allowing for frequent data collection without sedation. In addition, EEG is a direct measurement of neuronal activity reflective of underlying network circuitry and therefore can capture the development and maturation of functional networks.

There are two notable findings related to our prediction error. First, we observed significant heteroskedasticity with increasing variance in predicted error with age. Brain volume dramatically increases in the first two years of life and then gradually slows down [27]; maximum synaptic density in middle frontal gyrus is reached at age 15 months, followed by synaptic pruning [3]. The fast changes in power spectra observed in infants match with these

| Study       | Modality           | Age range (years) | Sample size | R <sup>2</sup> | MAE (age range)                                        |
|-------------|--------------------|-------------------|-------------|----------------|--------------------------------------------------------|
| <b>Here</b> | <b>Resting EEG</b> | <b>0 - 3</b>      | <b>938</b>  | <b>0.82</b>    | <b>0.19 (0 - 2 years)</b><br><b>0.25 (0 - 3 years)</b> |
| [14]        | sMRI               | 0 - 2             | 76          | 0.79           | 0.15 (0 - 2 years)                                     |
| [15]        | sMRI               | 0 - 5             | 220         | 0.97           | 0.19 (0 - 5 years)                                     |
| [16]        | sMRI               | 0 - 3             | 658         | 0.85           | 0.19 (0 - 3 years)                                     |
| [12]        | Resting M/EEG      | 0 - 95            | 2540        | 0.74           | > 6.48 (0 - 95 years)                                  |
| [11]        | Sleep EEG          | 0 - 18            | 1056        | 0.96           | ~ 0.25 (0 - 2 years)                                   |

**Table 2** Model performance comparison with literature  
MAE: mean absolute error; sMRI: structural MRI

early, dynamic changes in the brain; once brain networks are more established in the second and third year, the power spectra becomes relatively stable [28]. This may explain the increased error variance at older ages. Second, as is commonly reported in brain age studies based on MRI data [17, 29, 30], we observed an “age bias”, characterized by the overestimation of age in younger children and underestimation in older children (Figure 2D). Age bias in predictive models is thought to be the direct result of fitting a regression model by minimizing the sum of the squares [31] and some studies have attempted to account for this through several bias correction methods performed after model estimation [17, 29, 30]. However, there are concerns that such correction may artificially inflate certain performance metrics such as the R<sup>2</sup> values [31]. Thus, we have chosen to present uncorrected data, ensuring our findings are directly comparable to existing literature.

In this study, we also demonstrated a computational framework to estimate joint feature importance within clusters across highly correlated features. Analyzing feature importance quantifies the contribution of specific power measures on brain age prediction and may help understand the developmental trajectory of brain functions.

Using this method, important contributors to age prediction were identified including aperiodic offset and periodic power features in the low/high alpha, low beta, and theta band (Figure 3D and 3E). Developmentally, these features exhibit an approximately linear or monotonic relationship with age, which may have facilitated their feature importance in prediction models. Specifically, longitudinal modeling using generalized additive mixed models (GAMMs) of an overlapping data set recently demonstrated that aperiodic offset increases in the first year and then stays relatively stable between 1 - 3 years of age [28]. Aperiodic activity is hypothesized to be associated with strong broad band neural firing and the early increase is consistent with dramatic increases in gray matter volume and synaptogenesis observed in the first year [27, 32]. Theta and alpha oscillations have been implicated in thalamocortical circuitry development, and theta and alpha power also have more linear relationships with age [28, 33]. Alpha peak frequency shows age-dependent changes with peak frequency in the theta range in infancy, increasing to the alpha range by toddlerhood. This leads to a linear decrease in theta power from 1 - 3 years and a steady increase in high alpha power across the infant/toddler period. Linear increases are also observed in low beta band power across the first 3 years. In addition, a peak in the low beta range begins to emerge after the first year and is captured in the PC2 beta component included in the C1 cluster. These changes in beta power may represent the emergence of network connections between thalamic nuclei and cortical layers [33]. In summary, the identified importance of aperiodic offset and periodic power in theta, alpha, and beta bands may reflect their critical role in early brain development.

Our findings also support the use of EEG age prediction in early identification of neurodevelopmental delays. Age-predictions were significantly lower for two neurodevelopmental disorders associated with brain alterations and neurodevelopmental delay. The concept of a brain age gap — the difference between predicted and actual age — has been most thoroughly studied in brain degeneration [7, 13, 34, 35], brain injuries [36, 37], and mental disorders [38-40]. To date, we identified only three studies assessing individuals with neurodevelopmental disorders related to brain age gaps. Wang et al. [9] developed a prediction model using both structural and functional MRI data and reported significantly lower brain age gap in an



ASD group (5 – 23 years) compared to a non-autistic group. They also observed associations between lower brain age gaps with lower ADOS scores within the ASD group. Tunc et al. [10] predicted brain age in individuals with ASD (6 – 25 years) using anatomical and diffusion metrics computed from MRI data and similarly observed that lower brain age was associated with higher ADOS severity scores. Iyer et al. [11] predicted age from sleep EEG and observed significantly lower brain age gap in children with DS (1 – 9 years) compared to the TD group.

Aligned with findings in prior literature, our EEG-based model was capable of generating distinguishable age predictions between ASD and TD groups at 3 years of age, and between DS and TD groups as early as 2 years of age (Figure 4A and C). We observed a negative and significantly lower brain-age gap for children with ASD (in the 1000 – 1150 days age bin) and DS compared to TD peers (Figure 4B and D). This preliminary data suggests that EEG brain gap measures could be clinically useful in identifying children with neurodevelopmental delays. Ideally such a measure would identify children before delays are present to facilitate earlier intervention. This will benefit children with disorders such as Fragile X syndrome and Tuberous Sclerosis Complex, where there are no obvious dysmorphisms at birth and diagnoses are often delayed. Future research with larger, diversified samples of both typically developing infants and infants with later identified delays are needed to build such clinical tools with sufficient accuracy.

It is important to clarify that the MLP model in this study was specifically developed to predict chronological age, not to identify individuals who might later be diagnosed with ASD or have DS. This distinction is crucial for interpreting our findings, particularly the group-level differences in brain age gap. While we observed significant negative brain age gaps in ASD and DS groups, this does not mean that a negative brain age gap is exclusively linked to ASD/DS, and it is not intended for diagnosing or screening for any neurodevelopmental disorder in particular.

The contribution of this study is subject to two major limitations. First, though we built our models using one of the largest developmental EEG data for our age range of interest, it is still not as large as the samples used in MRI-based age predictions [6, 13, 16, 41], and may even be considered small in the field of machine learning. Additionally, the majority of our data was collected from children who are disproportionately White and from families with a high socioeconomic status, lacking the diversity necessary to represent children of all backgrounds. Second, we acknowledge that more than one processing pipeline is available for developmental EEG [42–44], and the choice of pipeline and parameters may likely affect the output EEG, and thus the brain age prediction. Given it is impractical to evaluate our models across every processing configuration, we opted for one that we consider to be broadly reasonable. We are making our processing scripts, the parameters used, and the model training and testing scripts publicly available online, and welcome other researchers to test our method with their own data.

## 4 Conclusion

This study demonstrates the feasibility and accuracy of predicting chronological age from resting-state EEG features in infants and toddlers using a computational model. By analyzing data from a large cohort of typically developing children 2 to 38 months old, we identified significant EEG feature clusters that contribute most to age prediction. Moreover, the model’s ability to identify negative brain age gaps in children with autism spectrum disorder and Down syndrome suggests its potential as a tool for early detection of neurodevelopmental disorders. These findings support the clinical utility of EEG-based brain age prediction in monitoring and identifying early signs of developmental delays, enabling timely interventions.

## 514 **5 Methods**

515

### 516 **5.1 Studies and Participants**

517

518

519

520

521

522

523

524

525

526

527

528

529

530

531

532

533

534

535

536

537

538

539

540

541

542

543

544

545

546

547

548

549

550

551

552

553

554

555

556

557

558

559

560

561

562

563

564

565

566

567

568

569

570

EEGs for this paper were collected in a single lab at Boston Children's Hospital as part of four different longitudinal studies. Sample numbers and demographics are shown in Table 3. Each study is described below.

Emotion Project (IRB-P00002876) was a cohort/longitudinal study with infants enrolled at either 5, 7, or 12 months of age and then followed through school age. EEG for enrolled infants was collected at age of enrollment and again at 3 years of age. While no developmental assessments were performed for this study, parents completed questionnaires regarding child development, interventions received, and diagnoses, including ASD diagnoses.

Healthy Baby (IRB-P00019083) was a longitudinal study enrolling infants at 2 months of age with developmental assessments (Mullen Scales of Early Learning – MSEL [45]) and EEG collected at 2, 6, 9, 12, 24, and 36 months.

Infant Sibling Project and Infant Screening Project (IRB-X06-08-0374, IRB-P00018377) enrolled infants with and without a first degree family history of ASD (most often a full-sibling with autism) as early as 3-months of age. The Infant Screening Project also included infants with elevated social communication concerns at 12 months of age, and were excluded from this analysis. EEG and MSEL were administered at 3, 12, 18, 24, and 36 months across both studies, as well as 6 and 9 months of the Infant Sibling Project. Infants were assessed for ASD using the Autism Diagnostic Observation Schedule [46] or during the COVID pandemic some participants completed remote evaluations that included the Brief Observation of Symptoms of Autism [47], parent-child interaction, the Autism Screening Interview [48] and Vineland Adaptive Behavior Scales-Third Edition [49]. For toddlers meeting criteria on the ADOS or BOSA, a licensed clinical psychologist reviewed assessments and provided their best clinical judgement for ASD diagnosis based on criteria from the Diagnostic Statistical Manual of Mental Disorders, Fifth Edition [50].

All infants in the typically developing (TD) group were born with a minimal gestational age of 36 weeks, had no history of prenatal or postnatal medical or neurological disorders, and no known genetic disorders. Our age prediction model development was limited to participants without first degree family history of autism or known developmental delay or autism diagnosis. Exclusion based on developmental delays was determined as follows. Children with MSEL T-scores  $<40$  on expressive language, receptive language, visual reception, or fine motor subscales at either 24 or 36 months were excluded. For children in the Emotion project where MSEL was not performed, children were excluded if parents reported a community diagnoses of speech or motor delay or if children were receiving Early Intervention services, or speech, occupational, or physical therapy services.

The ASD cohort ( $n = 85$ , 21 females; 246 EEG recordings,  $15.8 \pm 9.6$  months, range 2.1 – 37.7 months) included children who received a research-based clinical judgement of autism from Infant Sibling and Infant Screening Projects ( $n = 70$ , 214 EEG recordings), or children whose parents reported a community-based diagnosis ( $n = 15$ , 32 recordings) during follow up research visits.

The Down syndrome (DS) cohort ( $n = 21$ , 12 females; 21 EEG recordings, average age  $26.4 \pm 6.0$  months, range 13.9 – 36.8 months) included in this study was recruited as part of two separate studies collected in the same lab from 2019 – 2022 (IRB-P00018377, IRB-P00025806). DS participants all had Trisomy 21, a minimum gestational age of 36 weeks, and their families spoke primarily English at home ( $>50\%$ ). Children with known neurological disorders (e.g. intraventricular hemorrhage, seizure disorder) were excluded.

### 563 **5.2 EEG collection and processing**

564

565

566

567

568

569

570

Resting-state (non-task related) EEG data was collected using similar protocols across studies. The infant was seated with their caregiver in a dimly lit, sound attenuated room with a faraday cage to reduce noise. For the Emotion, Healthy Baby, Infant Screening Project studies a video of either infant toys or abstract moving objects were shown. For the Infant Sibling Project, a research assistant presented bubbles or showed toys to the infant in order

|                                                                                    | Combined<br>Studies<br>N = 467 | Healthy<br>Baby<br>N = 13 | Infant<br>Sibling<br>N = 53 | Emotion<br>Project<br>N = 317 | Infant<br>Screening<br>N = 84 |     |
|------------------------------------------------------------------------------------|--------------------------------|---------------------------|-----------------------------|-------------------------------|-------------------------------|-----|
| <b>Sex, % Female (n)</b>                                                           | 49.0 (229)                     | 69.2 (9)                  | 52.8 (28)                   | 48.3 (153)                    | 46.4 (39)                     | 571 |
| <b>Ethnicity, % (n)</b>                                                            |                                |                           |                             |                               |                               | 572 |
| Hispanic                                                                           | 8.8 (41)                       | 23.1 (3)                  | 1.9 (1)                     | 11.0 (35)                     | 2.4 (2)                       | 573 |
| Non-Hispanic                                                                       | 89.9 (420)                     | 76.9 (10)                 | 96.2 (51)                   | 87.7 (278)                    | 96.4 (81)                     | 574 |
| Not answered                                                                       | 1.3 (6)                        | 0.0 (0)                   | 1.9 (1)                     | 1.3 (4)                       | 1.2 (1)                       | 575 |
| <b>Race, % (n)</b>                                                                 |                                |                           |                             |                               |                               | 576 |
| White                                                                              | 77.9 (364)                     | 15.4 (2)                  | 83.0 (44)                   | 79.5 (252)                    | 78.6 (66)                     | 577 |
| Black/<br>African-American                                                         | 3.2 (15)                       | 46.2 (6)                  | 0.0 (0)                     | 2.2 (7)                       | 2.4 (2)                       | 578 |
| Asian                                                                              | 4.1 (19)                       | 0.0 (0)                   | 3.8 (2)                     | 3.8 (12)                      | 6.0 (5)                       | 579 |
| More than one race                                                                 | 12.8 (60)                      | 23.1 (3)                  | 11.3 (6)                    | 12.9 (41)                     | 11.9 (10)                     | 580 |
| Other                                                                              | 0.6 (3)                        | 7.7 (1)                   | 0.0 (0)                     | 0.6 (2)                       | 0.0 (0)                       | 581 |
| Not answered                                                                       | 1.3 (6)                        | 7.7 (1)                   | 1.9 (1)                     | 0.9 (3)                       | 1.2 (1)                       | 582 |
| <b>Family Income, % (n)</b>                                                        |                                |                           |                             |                               |                               | 583 |
| <\$35,000                                                                          | 3.6 (17)                       | 23.1 (3)                  | 5.7 (3)                     | 2.2 (7)                       | 4.8 (4)                       | 584 |
| \$35,000 - \$75,000                                                                | 10.7 (50)                      | 15.4 (2)                  | 7.5 (4)                     | 13.2 (42)                     | 2.4 (2)                       | 585 |
| >\$75,000                                                                          | 76.7 (358)                     | 38.5 (5)                  | 69.8 (37)                   | 76.0 (241)                    | 89.3 (75)                     | 586 |
| Not answered/<br>Don't know                                                        | 9.0 (42)                       | 23.1 (3)                  | 17.0 (9)                    | 8.5 (27)                      | 3.6 (3)                       | 587 |
| <b>Participant EEG data included in analysis,<br/>n (% with longitudinal data)</b> |                                |                           |                             |                               |                               | 588 |
| 50-140 days                                                                        | 52 (92)                        | 13 (100)                  | 8 (100)                     | -                             | 31 (87)                       | 589 |
| 140-165 days                                                                       | 101 (29)                       | -                         | -                           | 101 (29)                      | -                             | 590 |
| 165-250 days                                                                       | 161 (49)                       | 12 (100)                  | 36 (100)                    | 113 (27)                      | -                             | 591 |
| 250-350 days                                                                       | 52 (100)                       | 10 (100)                  | 42 (100)                    | -                             | -                             | 592 |
| 350-500 days                                                                       | 224 (67)                       | 10 (100)                  | 46 (100)                    | 93 (22)                       | 75 (97)                       | 593 |
| 500-700 days                                                                       | 86 (99)                        | -                         | 28 (100)                    | -                             | 58 (98)                       | 594 |
| 700-1000 days                                                                      | 94 (99)                        | 10 (100)                  | 38 (100)                    | -                             | 46 (98)                       | 595 |
| 1000-1150 days                                                                     | 168 (93)                       | 6 (100)                   | 38 (97)                     | 90 (89)                       | 34 (97)                       | 596 |
| By participant,<br>mean # EEGs (SD)                                                | 2.0 (1.4)                      | 4.7 (1.2)                 | 4.5 (1.5)                   | 1.3 (0.4)                     | 2.9 (1.0)                     | 597 |

**Table 3** Sample Characteristics

to help the infant remain calm. Emotion, Healthy Baby, and Infant Screening Project studies used a 128-channel Hydrocel Geodesic Sensor Nets (Electrical Geodesics, Inc., Eugene, OR) connected to a NetAmps 300 amplifier (Electrical Geodesic Inc.) to collect continuous EEG recordings with a 500Hz sampling rate. The Infant Sibling Project included recordings from either 64-channel Geodesic Sensor (< 10% of data) or a 128-channel Hydrocel Geodesic Sensor Nets (Electrical Geodesics, Inc., Eugene, OR), connected to either a NetAmps 200 or 300 amplifier (Electrical Geodesic Inc.) and sampled at either 250 or 500Hz. Data was referenced to the single vertex electrode, Cz, and electrooculographic electrodes were removed to improve infant comfort.

EEG raw files were collected in Netstation (Electrical Geodesics, Inc) and exported to MATLAB for preprocessing with the Batch Automated Processing Platform (BEAPP [51]) using the integrated Harvard Automated Preprocessing Pipeline for EEG (HAPPE [52]). A 1Hz high-pass and 100Hz low-pass filter were applied, and EEG data sampled at 500Hz were resampled to 250Hz. HAPPE artifact removal included 60Hz line noise removal, bad channel rejection, and artifact removal using first wavelet thresholding, followed by independent component analysis and Multiple Artifact Rejection Algorithm (MARA [53]). The following channels, in addition to the 10-20 electrodes, were used for MARA: 64-channel net – 16, 9, 8, 3, 58, 57, 21, 25, 18, 30, 43, 50, 53, 32, 33, 38, 41, 45; and 128-channel net – 28, 19, 4, 117, 13, 112, 41, 47, 37, 55, 87, 103, 98, 65, 67, 77, 90, 75, evenly covering all brain regions of interest. Next channels removed during bad channel rejection were interpolated, data were

628 re-referenced to the average reference, detrended to the signal mean and segmented into 2-  
629 second segments. Segments were then further evaluated for and rejected for retained artifact  
630 using HAPPE’s amplitude and joint probability criteria.

631 EEG rejection criteria: HAPPE quality metrics were used to reject EEG recordings from  
632 subsequent analysis. EEG were rejected if they had fewer than 20 segments (40 seconds of  
633 total EEG), < 80% good channels, > 80% of independent components rejected, > 0.3 mean  
634 artifact probability of components kept, and < 25% percent variance retained.

635

## 636 **5.3 Feature extraction**

637

### 638 **5.3.1 Spectral parameterization**

639 Using the BEAPP Power Spectral Density (PSD) module, the PSD at each electrode, for each  
640 2-second segment, was calculated using a multitaper spectral analysis with three orthogonal  
641 tapers. For each electrode the PSD was then averaged across 2-second segments, and then  
642 averaged across electrodes in defined left frontal, right frontal, central, left temporal right  
643 temporal, and posterior regions of interest (Supplementary Figure 2).

644 The resulting PSD was then parametrized into aperiodic and periodic components using  
645 SpecParam v1.0.0 (ref; <https://github.com/foof-tools/foof>; in Python v3.6.8). SpecParam  
646 was modified for use in this age range — reason for and detailed description of modifications,  
647 along with modified code are discussed in [28]. SpecParam model parameters were: fixed  
648 mode, peak\_width\_limits set to [0.5, 18.0], max\_n\_peaks = 7, and peak\_threshold = 2. Detail  
649 evaluation of model fit across age ranges are also presented in [28].

650 Features extracted for age prediction include aperiodic parameters (offset and slope),  
651 periodic power across canonical frequency bands, and peak/amplitude characteristics of peri-  
652 odic peaks. Periodic power across canonical frequency bands [theta (4 – 6Hz), low alpha (6  
653 – 9Hz), high alpha (9 – 12Hz), low beta (12 – 20Hz), high beta (20 – 30Hz), and gamma (30  
654 – 45Hz)] was calculated. Peak characteristics were determined after the periodic spectrum  
655 was smoothed using a savgol filter (`scipy.signal.savgol_filter`, window length = 101, poly-  
656 order = 8). Kurtosis and skewness, characterizing the shape of power distributions, were  
657 calculated from the broad alpha range (4 – 12 Hz) and broad beta range (14 – 45 Hz) using  
658 `scipy` functions.

659

### 660 **5.3.2 Principal component analysis**

661

662 We observed multiple shifts in periodic peaks with respect to age within the broad alpha  
663 range (4 – 12 Hz) and broad beta range (14 – 45 Hz) (Figure 1). Detailed characterization of  
664 these peak shifts utilizing an overlapping dataset are described in [28]. To capture this change  
665 across canonical frequency bands, we performed a principal component analysis (PCA) on  
666 the periodic power spectrum within each of these two broad ranges, identifying intrinsic  
667 functions that make up the spectrum. The top three PCs in each frequency range explain  
668 over 90% of the variance in the data and have distinctive peaks (Figure 1). The weight  
669 of each PC, quantifying the representation of each intrinsic function in data, was used as  
670 features in our age prediction models. This PCA step added six features (i.e., the weights  
671 of three PCs in each of the two frequency ranges) for each ROI, resulting in a total feature  
672 vector length of 72 (48 from spectral parameterization and 24 from PCA).

673

## 674 **5.4 Regression models**

675

676 We used Scikit-learn [54] to train and test four regression models for predicting chronological  
677 age using the extracted features. Prior to training, we preprocessed and transformed the data  
678 to enhance model performance. Each EEG feature was individually scaled to [0, 1] using a  
679 min-max scaler to avoid potential bias toward features with higher magnitude values and  
680 improve gradient descent optimization. This could also improve the optimization process  
681 by making the flow of gradient descent smoother. We then conducted recursive feature  
682 elimination (RFE) with a linear support vector regression kernel to remove features with  
683 low importance, resulting in approximately 60 retained features in each training iteration.  
684 For the dependent variable, we applied the Yeo-Johnson transformation to the chronological

age to achieve a more Gaussian-like distribution, which is particularly important since we observed heteroscedasticity in the model prediction, as shown in Figure 2D.

#### 5.4.1 Lasso regression

We conducted experiments with elastic-net linear regression using varying ratios (0 to 1) of lasso and ridge regression. Our highest prediction accuracy was achieved with pure lasso. For L1 regularization, we set  $\alpha$  to 0.001.

#### 5.4.2 Random Forest

We used 100 estimators (trees) with a maximum depth of 10. The maximum number of features in searching for the best split was set as the square root of feature length. Bootstrap was implemented when trees are being formed.

#### 5.4.3 XGBoost

XGBoost (Extreme Gradient Boosting,) is a gradient boosting decision tree framework. To prevent overfitting and ensure the generalizability of the learned model to new data, we employed a conservative parameter set for this algorithm. Specifically, we set a moderate maximum tree depth of 4, a low learning rate of 0.1, and a high  $\alpha$  value of 0.1 for L1 regularization.

#### 5.4.4 Multilayer perceptron

A multilayer perceptron (MLP) is a type of feed-forward artificial neural network where all layers of neurons are fully connected and each neuron has an activation function to introduce nonlinearity to the model. In our experimentation with MLP models, we explored various architectures and hyperparameters, including the number of layers, the number of neurons in each layer, and levels of regularization. Our best performing model consisted of five hidden layers with 120, 120, 80, 60, and 40 neurons, respectively, with the rectified linear unit function serving as the activation function 2B. We set the  $\alpha$  value for L2 regularization to 0.01, the batch size to 20, and gradually decreased the learning rate as a function of iteration number. Our findings indicate that MLP models with similar layer and neuron configurations to our best model typically yield comparable results.

### 5.5 Repeated cross-validation

We employed a 5-fold cross-validation to assess the performance of our models. To ensure that each fold had an equal number of samples across different age ranges, we divided the data into eight age bins, namely 0–140 days, 140–165 days, 165–250 days, 250–350 days, 350–500 days, 500–700 days, 700–1000 days, and 1000–1150 days, based on the sample distribution (Table 3). For each iteration, we pseudo-randomly assigned samples into five equal folds and ensured that the distribution of samples in each age range was balanced across folds. We then trained the model on four folds and tested it on the left-out fold. We prevented information leakage by conducting PCA and all data preprocessing steps, including scaling, recursive feature elimination (RFE), and Yeo-Johnson transformation, only on the training set. We then applied the fitted transformers on both the training and test sets. The model's performance was evaluated using the coefficient of determination ( $R^2$ ) value and the mean absolute error (MAE) of the test samples across all five iterations within the same train-test split. To reduce the influence of random data splits, we repeated this process ten times, each time with a different train-test split. We calculated the mean and standard deviation of the  $R^2$  and MAE values across the repetitions to verify the performance stability of our model.

### 5.6 Bagging cross-validated models

To further reduce the variance in predictions caused by the randomness in data splitting and improve model performance, we implemented the *bagging* technique, also known as *bootstrap aggregating*. We aggregated the models trained over ten repetitions of the train-test

742 split. Following the repeated cross-validation described above, each sample in the dataset  
743 was tested ten times, each time using a slightly different model that was trained on a  
744 randomly drawn 80% of the total data (bootstrapping). However, it is possible that some  
745 of these models were suboptimal due to overfitting or underfitting, particularly with small  
746 sample sizes and excessive noise in data. Averaging the prediction results for a sample over  
747 multiple models (aggregating) can theoretically mitigate this problem, as such averaging can  
748 potentially remove undesirable characteristics of each model while synergizing their positive  
749 attributes [55]. We used the mean of ten predictions as the bagged prediction for a sample  
750 and calculated  $R^2$  and MAE using these bagged predictions.

751

## 752 **5.7 Feature importance**

753

754 In this study, a crucial question we aimed to address is which features in resting-state EEG  
755 drive age prediction. Though not detrimental to the overall prediction accuracy [56, 57],  
756 including highly correlated features in a regression model — especially features extracted  
757 from neighbouring electrodes or ROIs — would negatively impact the ability to accurately  
758 interpret the statistical importance of each independent variable (feature) [58, 59]. Here,  
759 we proposed a viable approach to circumvent this multicollinearity problem by evaluating  
760 feature importance at a cluster level using hierarchical clustering and Shapley Additive  
761 Explanations (SHAP) values (Figure 3A).

762

### 763 **5.7.1 Shapley values**

764 The Shapley value employs concepts in game theory and fairly distributes both gains and  
765 costs to features working in coalition. Specifically, each feature of an observation is assigned  
766 with a Shapley value, which equals the amount that this feature steers the model away from  
767 a baseline prediction (the sample mean). Using the SHAP python package [60], we calculated  
768 SHAP values from each sample in the TD group via a 5-fold cross-validation, in which an  
769 MLP model was trained with 4 folds of data, and feature importance was calculated for the  
770 left-out fold (test fold). This process was repeated five times, each with a different test fold,  
771 so that each sample was tested once, and hence had one set of SHAP values.

772

### 773 **5.7.2 Feature clustering**

774

775 We grouped all EEG features into clusters based on the Pearson's correlation between each  
776 pair of EEG features and used one minus the absolute value of this correlation as a measure  
777 of distance between features. Then we applied the Ward hierarchical clustering to group  
778 features into clusters. By setting a reasonable distance threshold, we divided the 72 features  
779 into 11 clusters (Figure 3B).

780

### 781 **5.7.3 Cluster-SHAP**

782 Employing its additivity property, we summed SHAP across features in each cluster for  
783 their joint SHAP score (Cluster-SHAP). We then compared Cluster-SHAP among feature  
784 clusters to evaluate their relative importance. Cluster importance can then be evaluated  
785 from the mean absolute value of Cluster-SHAP across samples and the correlation between  
786 Cluster-SHAP and actual age. In both metrics, a higher value indicates greater cluster  
787 importance [26].

788

## 789 **5.8 Prediction on children with autism or Down syndrome**

790

791 We further examined our MLP model's sensitivity in identifying potential neurodevelopmental  
792 delays by testing it on data from the ASD and the DS groups. For the ASD group, we  
793 first age-matched each sample ( $n = 85$ , 246 EEG recordings) with one from the TD group  
794 (test set). Then, we retrained the MLP model with the remaining TD samples and applied  
795 this new model on the test set. Similarly, for the DS group, we age-matched each sample ( $n$   
796  $= 21$ , 21 EEG recordings) with one from the TD group, retrained the MLP model with the  
797 remaining TD samples, and compared prediction errors between groups.

798

## 5.9 Statistical analysis

The correlation between predicted age and actual age and between Cluster-SHAP and actual age was evaluated by Pearson's  $r$  using the Scipy function. Group-level difference in age prediction error and EEG features was examined by a two-sample t-test.

**Supplementary information.** Supplementary information for this paper includes two figures.

**Acknowledgements.** We thank all the children and families who generously participated in this research. We thank all the research staff involved in participant recruitment, data collection, and database administration. We thank Dr. Helen Tager-Flusberg, Dr. Michelle Bosquet Enlow and Dr. Nicole Baumer for acquiring funding and helping to oversee projects that contributed data to this study.

**Funding.** This research was supported by the National Institutes of Health (R01-DC010290 and MH078829 to CAN, and K23DC07983 and T32MH112510 to CLW). Research was also supported by the the Rosamund Stone Zander Translational Neuroscience Center at Boston Children's Hospital and the Tapley Family Fund.

**Author contribution.** Winko W. An: Methodology, Software, Formal analysis, Writing Original Draft, Visualization. Aprotim C. Bhowmik: Portions of Formal Analysis, Writing – Review and Editing. Charles A. Nelson: Investigation, Resources, Writing – Review and Editing, Supervision, Project administration, Funding acquisition. Carol L. Wilkinson: Conceptualization, Investigation, Resources, Data Collection, Data Curation, Writing – Portions of Original Draft, Review and Editing, Supervision, Project administration.

**Data availability.** Consents obtained from human participants prohibit sharing of deidentified individual data without data use agreement in place. Please contact the corresponding author with reasonable data requests.

**Code availability.** Code used for EEG processing and analyses used in this paper can be found on the Open Science Framework (<https://osf.io/u3gp4>).

**Competing interests.** The authors declare no competing interests.

**Ethics approval and consent to participate.** All studies that contributed data to this work were reviewed and approved by IRB at Boston Children's Hospital (IRB-P0000287, IRB-P0001908, IRB-X06-08-0374, IRB-P0001837, IRB-P00018377, IRB-P00025806). Written consent was obtained prior to subject participation.

## References

- [1] Gilmore, J. H., Knickmeyer, R. C. & Gao, W. Imaging structural and functional brain development in early childhood. *Nature Reviews. Neuroscience* **19**, 123–137 (2018).
- [2] Mensen, V. T. *et al.* Development of cortical thickness and surface area in autism spectrum disorder. *NeuroImage : Clinical* **13**, 215–222 (2016). URL <https://www.ncbi.nlm.nih.gov/pmc/articles/PMC5157792/>.
- [3] Huttenlocher, P. R. & Dabholkar, A. S. Regional differences in synaptogenesis in human cerebral cortex. *The Journal of Comparative Neurology* **387**, 167–178 (1997).
- [4] Glantz, L. A., Gilmore, J. H., Hamer, R. M., Lieberman, J. A. & Jarskog, L. F. Synaptophysin and postsynaptic density protein 95 in the human prefrontal cortex from mid-gestation into early adulthood. *Neuroscience* **149**, 582–591 (2007).
- [5] Tau, G. Z. & Peterson, B. S. Normal Development of Brain Circuits. *Neuropsychopharmacology* **35**, 147–168 (2010). URL <https://www.nature.com/articles/npp2009115>. Publisher: Nature Publishing Group.

- 856 [6] Cole, J. H. & Franke, K. Predicting Age Using Neuroimaging: Innovative Brain Age-  
857 ing Biomarkers. *Trends in Neurosciences* **40**, 681–690 (2017). URL <https://www.sciencedirect.com/science/article/pii/S016622361730187X>.  
858  
859
- 860 [7] Löwe, L. C., Gaser, C., Franke, K. & Alzheimer’s Disease Neuroimaging Initiative.  
861 The Effect of the APOE Genotype on Individual BrainAGE in Normal Aging, Mild  
862 Cognitive Impairment, and Alzheimer’s Disease. *PloS One* **11**, e0157514 (2016).  
863
- 864 [8] Charissé, D. *et al.* Brain age and Alzheimer’s-like atrophy are domain-specific predictors  
865 of cognitive impairment in Parkinson’s disease. *Neurobiology of Aging* **109**, 31–42  
866 (2022). URL <https://www.sciencedirect.com/science/article/pii/S0197458021002748>.  
867
- 868 [9] Wang, Q. *et al.* Predicting brain age during typical and atypical development based on  
869 structural and functional neuroimaging. *Human Brain Mapping* **42**, 5943 (2021). URL  
870 [/pmc/articles/PMC8596985/](https://pubmed.ncbi.nlm.nih.gov/articles/PMC8596985/). Publisher: Wiley-Blackwell.  
871
- 872 [10] Tunç, B. *et al.* Deviation from normative brain development is associated with symptom  
873 severity in autism spectrum disorder. *Molecular Autism* **10**, 46 (2019).  
874
- 875 [11] Iyer, K. K. *et al.* A growth chart of brain function from infancy to adolescence based  
876 on EEG. *eBioMedicine* **102** (2024). URL [https://www.thelancet.com/journals/ebiom/](https://www.thelancet.com/journals/ebiom/article/PIIS2352-3964(24)00096-3/fulltext)  
877 [article/PIIS2352-3964\(24\)00096-3/fulltext](https://www.thelancet.com/journals/ebiom/article/PIIS2352-3964(24)00096-3/fulltext). Publisher: Elsevier.  
878
- 879 [12] Engemann, D. A. *et al.* A reusable benchmark of brain-age prediction from M/EEG  
880 resting-state signals. *NeuroImage* **262**, 119521 (2022). Publisher: Academic Press.  
881
- 882 [13] Franke, K., Ziegler, G., Klöppel, S. & Gaser, C. Estimating the age of healthy subjects  
883 from T1-weighted MRI scans using kernel methods: Exploring the influence of various  
884 parameters. *NeuroImage* **50**, 883–892 (2010). Publisher: Academic Press.  
885
- 886 [14] Cai, H., Li, A., Yu, G., Yang, X. & Liu, M. Brain Age Prediction in Developing  
887 Childhood with Multimodal Magnetic Resonance Images. *Neuroinformatics* **21**, 5–19  
888 (2023). URL <https://doi.org/10.1007/s12021-022-09596-1>. ISBN: 0123456789.  
889
- 890 [15] Hong, J. *et al.* Brain Age Prediction of Children Using Routine Brain MR Images via  
891 Deep Learning. *Frontiers in Neurology* **11**, 584682 (2020). Publisher: Frontiers Media  
892 S.A.  
893
- 894 [16] Hu, L. *et al.* MRI-based brain age prediction model for children under 3 years old using  
895 deep residual network. *Brain Structure and Function* **228**, 1771–1784 (2023). URL  
896 <https://doi.org/10.1007/s00429-023-02686-z>. ISBN: 0123456789.  
897
- 898 [17] Beheshti, I., Nugent, S., Potvin, O. & Duchesne, S. Bias-adjustment in neuroimaging-  
899 based brain age frameworks: A robust scheme. *NeuroImage. Clinical* **24**, 102063 (2019).  
900
- 901 [18] de Lange, A.-M. G. & Cole, J. H. Commentary: Correction procedures in brain-age  
902 prediction. *NeuroImage : Clinical* **26**, 102229 (2020). URL <https://www.ncbi.nlm.nih.gov/pmc/articles/PMC7049655/>.  
903
- 904 [19] Liang, H., Zhang, F. & Niu, X. Investigating systematic bias in brain age estimation  
905 with application to post-traumatic stress disorders. *Human Brain Mapping* **40**, 3143–  
906 3152 (2019).  
907
- 908 [20] Levin, A. R., Leal, A. S. M., Gabard-Durnam, L. J. & O’Leary, H. M. Beapp: The batch  
909 electroencephalography automated processing platform. *Frontiers in Neuroscience* **0**,  
910 513 (2018).  
911  
912



- [21] Gabard-Durnam, L. J., Leal, A. S. M., Wilkinson, C. L. & Levin, A. R. The harvard automated processing pipeline for electroencephalography (happe): Standardized processing software for developmental and high-artifact data. *Frontiers in Neuroscience* **12**, 97 (2018). URL <http://journal.frontiersin.org/article/10.3389/fnins.2018.00097/full>.
- [22] Donoghue, T. *et al.* Parameterizing neural power spectra into periodic and aperiodic components. *Nature Neuroscience* **23**, 1655–1665 (2020).
- [23] Lundberg, S. M. & Lee, S.-I. in *A unified approach to interpreting model predictions* (eds Guyon, I. *et al.*) *Advances in Neural Information Processing Systems* **30** 4765–4774 (Curran Associates, Inc., 2017). URL <http://papers.nips.cc/paper/7062-a-unified-approach-to-interpreting-model-predictions.pdf>.
- [24] Cava, W. L., Bauer, C., Moore, J. H. & Pendergrass, S. A. Interpretation of machine learning predictions for patient outcomes in electronic health records. *AMIA Annual Symposium Proceedings* **2019**, 572 (2019). URL <https://www.ncbi.nlm.nih.gov/pmc/articles/PMC7153071/>.
- [25] Molnar, C. *Interpretable Machine Learning* (Leanpub, 2020). URL <https://books.google.com/books?id=jBm3DwAAQBAJ>.
- [26] Lundberg, S. M. *et al.* From local explanations to global understanding with explainable AI for trees. *Nature Machine Intelligence* **2**, 56–67 (2020). URL <https://www.nature.com/articles/s42256-019-0138-9>. Publisher: Nature Publishing Group.
- [27] Bethlehem, R. A. I. *et al.* Brain charts for the human lifespan. *Nature* (2022). URL <https://www.nature.com/articles/s41586-022-04554-y>.
- [28] Wilkinson, C. L. *et al.* Developmental trajectories of EEG aperiodic and periodic power suggest timing of thalamocortical development during infancy. *bioRxiv* 2023.07.21.550114 (2023). URL <https://www.biorxiv.org/content/10.1101/2023.07.21.550114v1>. Publisher: Cold Spring Harbor Laboratory.
- [29] Smith, S. M., Vidaurre, D., Alfaro-Almagro, F., Nichols, T. E. & Miller, K. L. Estimation of brain age delta from brain imaging. *NeuroImage* **200**, 528–539 (2019). Publisher: Academic Press Inc.
- [30] Peng, H., Gong, W., Beckmann, C. F., Vedaldi, A. & Smith, S. M. Accurate brain age prediction with lightweight deep neural networks. *Medical Image Analysis* **68** (2021). Publisher: Elsevier B.V.
- [31] de Lange, A.-M. G. *et al.* Mind the gap: Performance metric evaluation in brain-age prediction. *Human Brain Mapping* **43**, 3113–3129 (2022). URL <https://onlinelibrary.wiley.com/doi/abs/10.1002/hbm.25837>. URL <https://onlinelibrary.wiley.com/doi/pdf/10.1002/hbm.25837>.
- [32] Manning, J. R., Jacobs, J., Fried, I. & Kahana, M. J. Broadband Shifts in Local Field Potential Power Spectra Are Correlated with Single-Neuron Spiking in Humans. *Journal of Neuroscience* **29**, 13613–13620 (2009). URL <https://www.jneurosci.org/content/29/43/13613>. Publisher: Society for Neuroscience Section: Articles.
- [33] Spitzer, B. & Haegens, S. Beyond the Status Quo: A Role for Beta Oscillations in Endogenous Content (Re)Activation. *eNeuro* **4**, ENEURO.0170–17.2017 (2017). URL <https://www.ncbi.nlm.nih.gov/pmc/articles/PMC5539431/>.
- [34] Ly, M. *et al.* Improving brain age prediction models: incorporation of amyloid status in Alzheimer’s disease. *Neurobiology of Aging* **87**, 44–48 (2020).

- 970 [35] Franke, K. & Gaser, C. Longitudinal changes in individual BrainAGE in healthy aging,  
971 mild cognitive impairment, and Alzheimer’s disease. *GeroPsych: The Journal of Gerontopsychology and Geriatric Psychiatry* **25**, 235–245 (2012). Place: Germany Publisher: Hogrefe Publishing.
- 974  
975 [36] Cole, J. H., Leech, R., Sharp, D. J. & Alzheimer’s Disease Neuroimaging Initiative. Prediction of brain age suggests accelerated atrophy after traumatic brain injury. *Annals of Neurology* **77**, 571–581 (2015).
- 978  
979 [37] Savjani, R. R., Taylor, B. A., Acion, L., Wilde, E. A. & Jorge, R. E. Accelerated Changes in Cortical Thickness Measurements with Age in Military Service Members with Traumatic Brain Injury. *Journal of Neurotrauma* **34**, 3107–3116 (2017).
- 982  
983 [38] Chung, Y. *et al.* Use of Machine Learning to Determine Deviance in Neuroanatomical Maturity Associated With Future Psychosis in Youths at Clinically High Risk. *JAMA psychiatry* **75**, 960–968 (2018).
- 986  
987 [39] Lee, W. H., Antoniadou, M., Schnack, H. G., Kahn, R. S. & Frangou, S. Brain age prediction in schizophrenia: Does the choice of machine learning algorithm matter? *Psychiatry Research. Neuroimaging* **310**, 111270 (2021).
- 989  
990 [40] Kolenic, M. *et al.* Obesity, dyslipidemia and brain age in first-episode psychosis. *Journal of Psychiatric Research* **99**, 151–158 (2018).
- 992  
993 [41] Valizadeh, S. A., Hänggi, J., Mérillat, S. & Jäncke, L. Age prediction on the basis of brain anatomical measures. *Human brain mapping* **38**, 997–1008 (2017). URL <https://pubmed.ncbi.nlm.nih.gov/27807912/>. Publisher: Hum Brain Mapp.
- 996  
997 [42] Monachino, A. D., Lopez, K. L., Pierce, L. J. & Gabard-Durnam, L. J. The HAPPE plus Event-Related (HAPPE+ER) software: A standardized preprocessing pipeline for event-related potential analyses. *Developmental Cognitive Neuroscience* **57**, 101140 (2022). Publisher: Elsevier.
- 1000  
1001 [43] Debnath, R. *et al.* The Maryland analysis of developmental EEG (MADE) pipeline. *Psychophysiology* **57**, e13580 (2020).
- 1003  
1004 [44] Kayhan, E. *et al.* DEEP: A dual EEG pipeline for developmental hyperscanning studies. *Developmental Cognitive Neuroscience* **54**, 101104 (2022). URL <https://www.sciencedirect.com/science/article/pii/S1878929322000482>.
- 1006  
1007  
1008 [45] Mullen E. *Infant Mullen Scales of Early Learning* (Springer, New York, NY, 1989). URL <http://www.pearsonclinical.com/childhood/products/100000306/mullen-scales-of-early-learning.html#tab-details>. Publication Title: TOTAL Child, Incorporated.
- 1011  
1012  
1013 [46] Lord, C. *et al.* Autism diagnostic observation schedule: a standardized observation of communicative and social behavior. *Journal of Autism and Developmental Disorders* **19**, 185–212 (1989).
- 1014  
1015  
1016  
1017 [47] Dow, D. *et al.* The Brief Observation of Symptoms of Autism (BOSA): Development of a New Adapted Assessment Measure for Remote Telehealth Administration Through COVID-19 and Beyond. *Journal of Autism and Developmental Disorders* **52**, 5383–5394 (2022). URL <https://www.ncbi.nlm.nih.gov/pmc/articles/PMC8674519/>.
- 1019  
1020  
1021  
1022 [48] Lord, C., Rutter, M. & Le Couteur, A. Autism Diagnostic Interview—Revised: A revised version of a diagnostic interview for caregivers of individuals with possible pervasive developmental disorders. *Journal of Autism and Developmental Disorders* **24**, 659–685 (1994). Place: US Publisher: Plenum Publishing Corp.
- 1023  
1024  
1025  
1026

- [49] Sparrow, S. S., Cicchetti, D. V. & Saulnier, C. A. *Vineland Adaptive Behavior Scales* (Pearson Education, Inc.;, London, 2018). URL <https://www.pearsonassessments.com/store/usassessments/en/Store/Professional-Assessments/Behavior/Adaptive/Vineland-Adaptive-Behavior-Scales-%7C-Third-Edition/p/100001622.html>. 1027  
1028  
1029  
1030  
1031
- [50] Diagnostic and Statistical Manual of Mental Disorders. URL <https://dsm.psychiatryonline.org/doi/book/10.1176/appi.books.9780890425596>. 1032  
1033  
1034
- [51] Levin, A. R., Méndez Leal, A. S., Gabard-Durnam, L. J. & O’Leary, H. M. BEAPP: The Batch Electroencephalography Automated Processing Platform. *Frontiers in Neuroscience* **0**, 513 (2018). Publisher: Frontiers. 1035  
1036  
1037  
1038
- [52] Gabard-Durnam, L. J., Mendez Leal, A. S., Wilkinson, C. L. & Levin, A. R. The Harvard Automated Processing Pipeline for Electroencephalography (HAPPE): Standardized Processing Software for Developmental and High-Artifact Data. *Frontiers in Neuroscience* **12**, 97 (2018). URL <http://journal.frontiersin.org/article/10.3389/fnins.2018.00097/full>. Publisher: Frontiers Media S.A. 1039  
1040  
1041  
1042  
1043
- [53] Winkler, I., Haufe, S. & Tangermann, M. Automatic Classification of Artifactual ICA-Components for Artifact Removal in EEG Signals. *Behavioral and Brain Functions* **7**, 30 (2011). URL <http://www.behavioralandbrainfunctions.com/content/7/1/30>. Publisher: BioMed Central Ltd ISBN: 1744-9081 (Electronic)\n1744-9081 (Linking). 1044  
1045  
1046  
1047  
1048
- [54] Pedregosa, F. *et al.* Scikit-learn: Machine learning in Python. *Journal of Machine Learning Research* **12**, 2825–2830 (2011). 1049  
1050  
1051
- [55] Watt, J., Borhani, R., Katsaggelos, A. K. & Cambridge University Press. Machine learning refined : foundations, algorithms, and applications 574. ISBN: 1108480721. 1052  
1053  
1054
- [56] Mundfrom, D., DePoy Smith, M. & Kay, L. The Effect of Multicollinearity on Prediction in Regression Models. *General Linear Model Journal* **44**, 24–28 (2018). URL <https://www.glmj.org/archives/articles/Mundfrom.v44n1.pdf>. 1055  
1056  
1057  
1058
- [57] Morris, J. & Lieberman, M. Multicollinearity’s Effect on Regression Prediction Accuracy with Real Data Structures. *General Linear Model Journal* **44**, 29–34 (2018). URL <https://www.glmj.org/archives/articles/Morris.v44n1.pdf>. 1059  
1060  
1061  
1062
- [58] Farrar, D. E. & Glauber, R. R. Multicollinearity in Regression Analysis: The Problem Revisited. *The Review of Economics and Statistics* **49**, 92–107 (1967). URL <https://www.jstor.org/stable/1937887>. Publisher: The MIT Press. 1063  
1064  
1065  
1066
- [59] Kim, J. H. Multicollinearity and misleading statistical results. *Korean Journal of Anesthesiology* **72**, 558–569 (2019). URL <https://www.ncbi.nlm.nih.gov/pmc/articles/PMC6900425/>. 1067  
1068  
1069  
1070
- [60] Lundberg, S. M. & Lee, S.-I. *A Unified Approach to Interpreting Model Predictions*, Vol. 30 (Curran Associates, Inc., 2017). URL [https://papers.nips.cc/paper\\_files/paper/2017/hash/8a20a8621978632d76c43dfd28b67767-Abstract.html](https://papers.nips.cc/paper_files/paper/2017/hash/8a20a8621978632d76c43dfd28b67767-Abstract.html). 1071  
1072  
1073  
1074  
1075  
1076  
1077  
1078  
1079  
1080  
1081  
1082  
1083
